# Supplementary material
Source: Copernicus journal article supplement (doi:10.5194/egusphere-2026-1458)
Supplement: Supplementary file 1 [file egusphere-2026-1458-supplement.pdf]

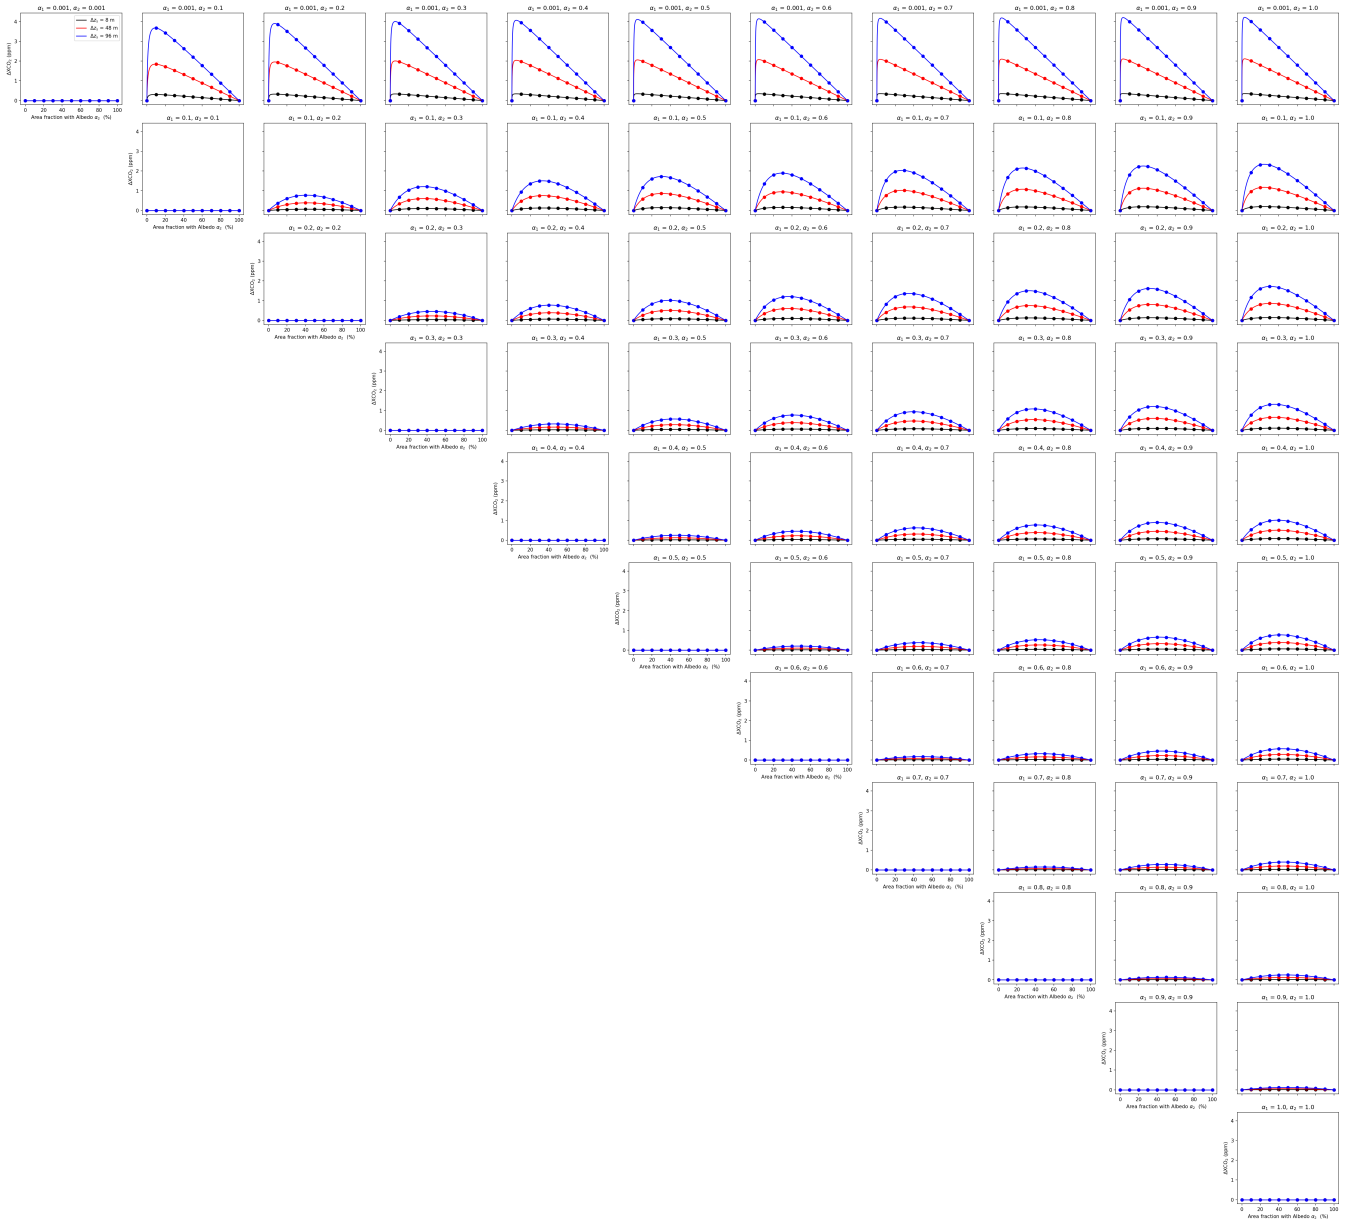

**Figure S1.** Same as Fig. 3 in the main text, but for many pairs of albedo values.

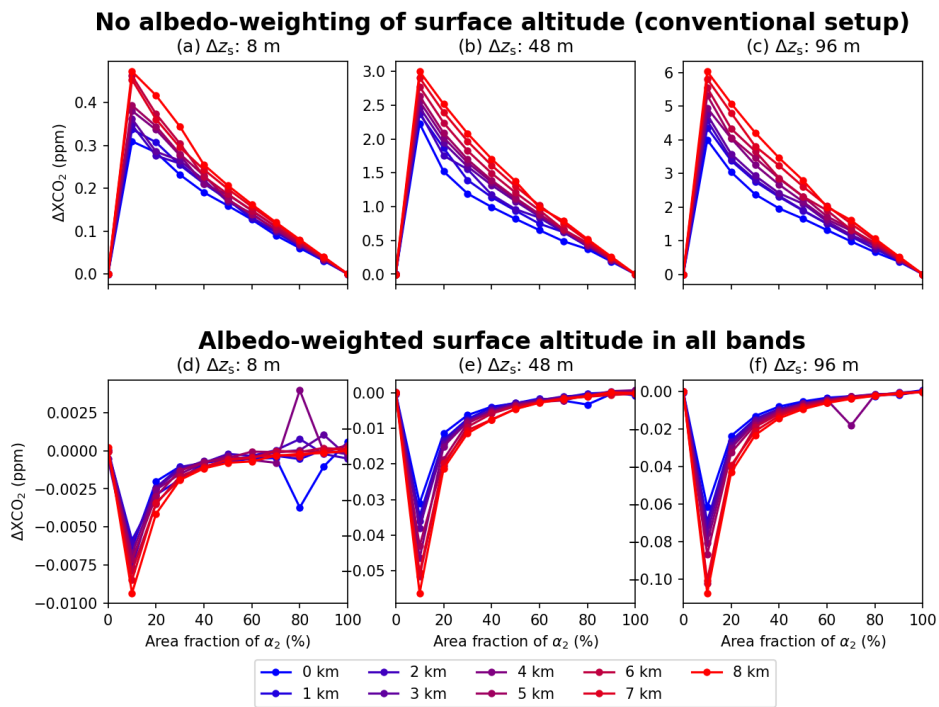

**Figure S2.** Same as Fig. 4 in the main text, but with different ranges on the y-axes.

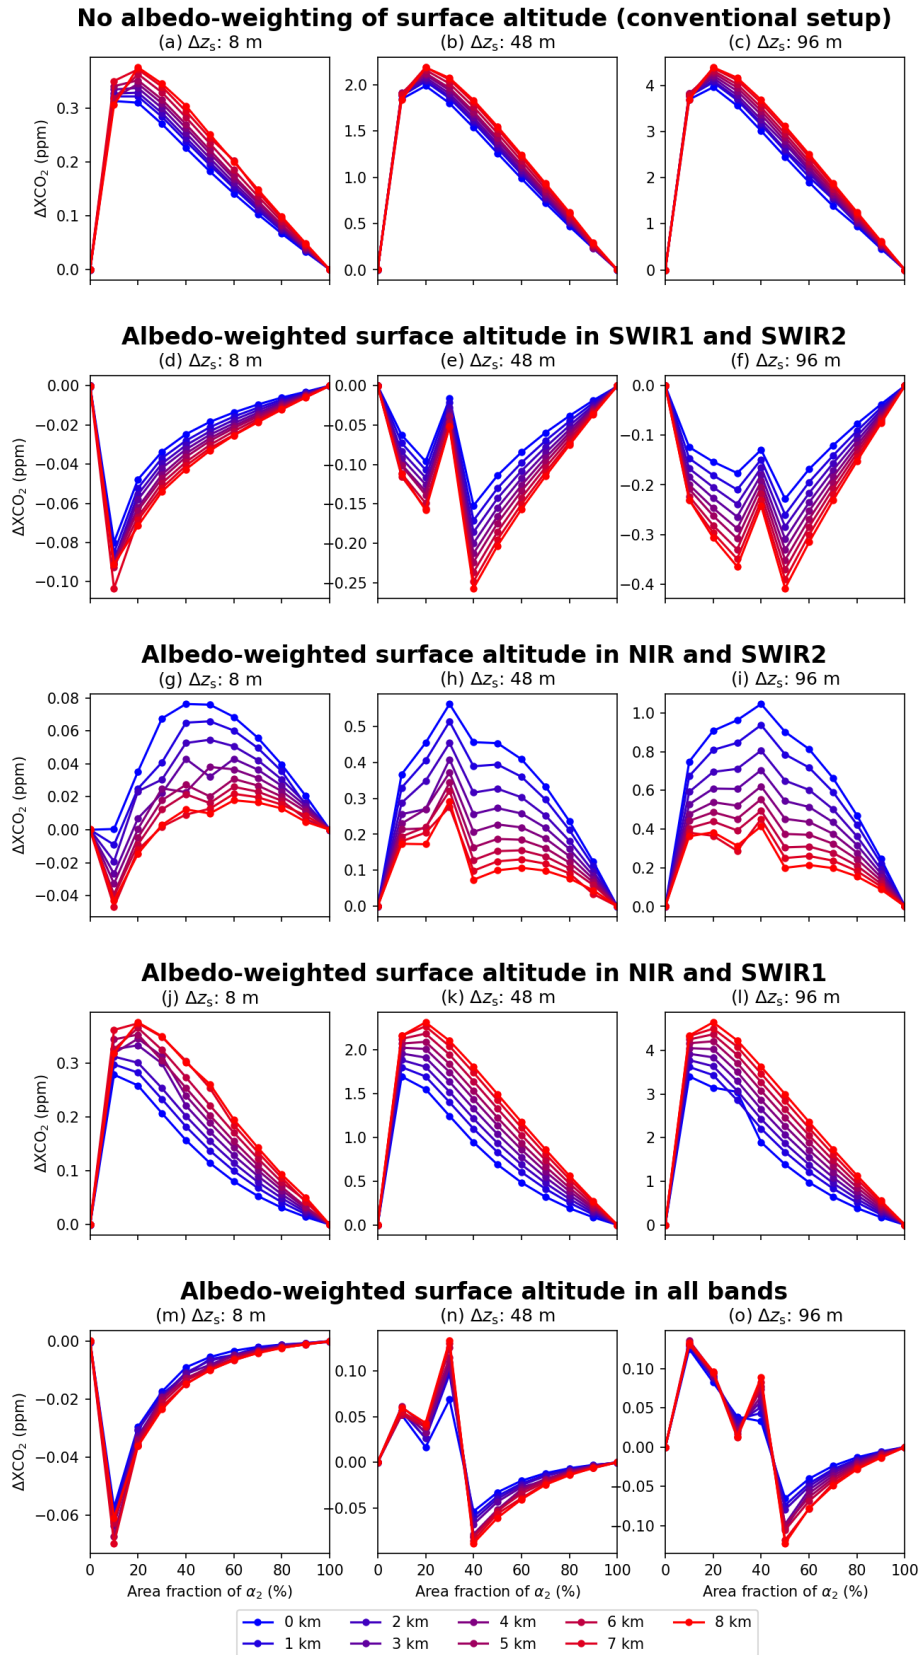

**Figure S3.** Same as Fig. 5 in the main text, but with different ranges on the y-axes.

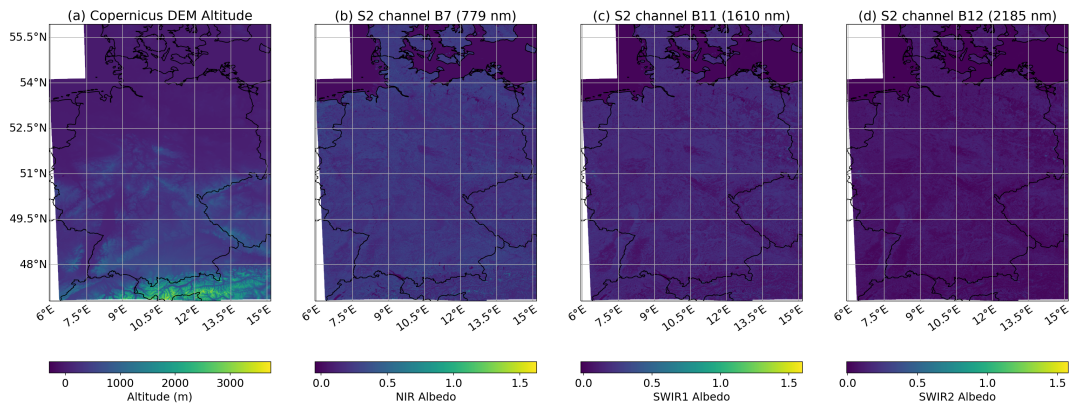

**Figure S4.** Same as Fig. 14 in the main text, but with color scales reflecting the minimum and maximum in each panel.

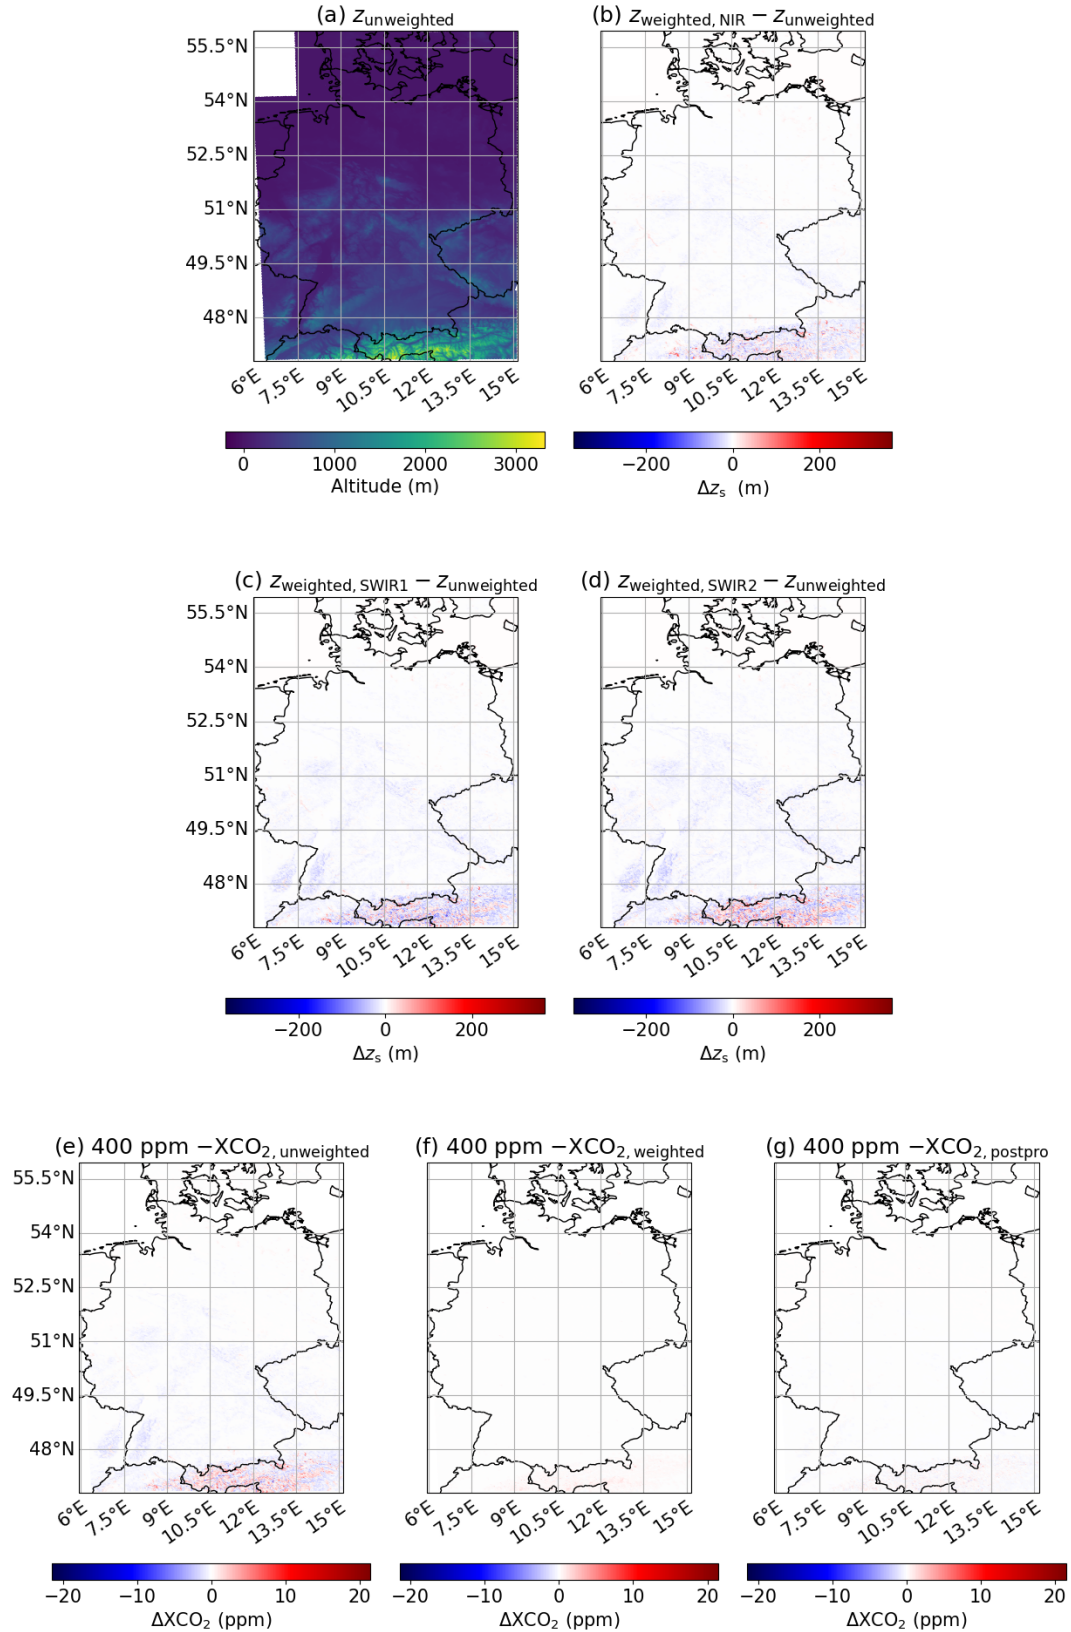

**Figure S5.** Same as Fig. 15 in the main text, but with color scales reflecting the minimum and maximum in each panel.

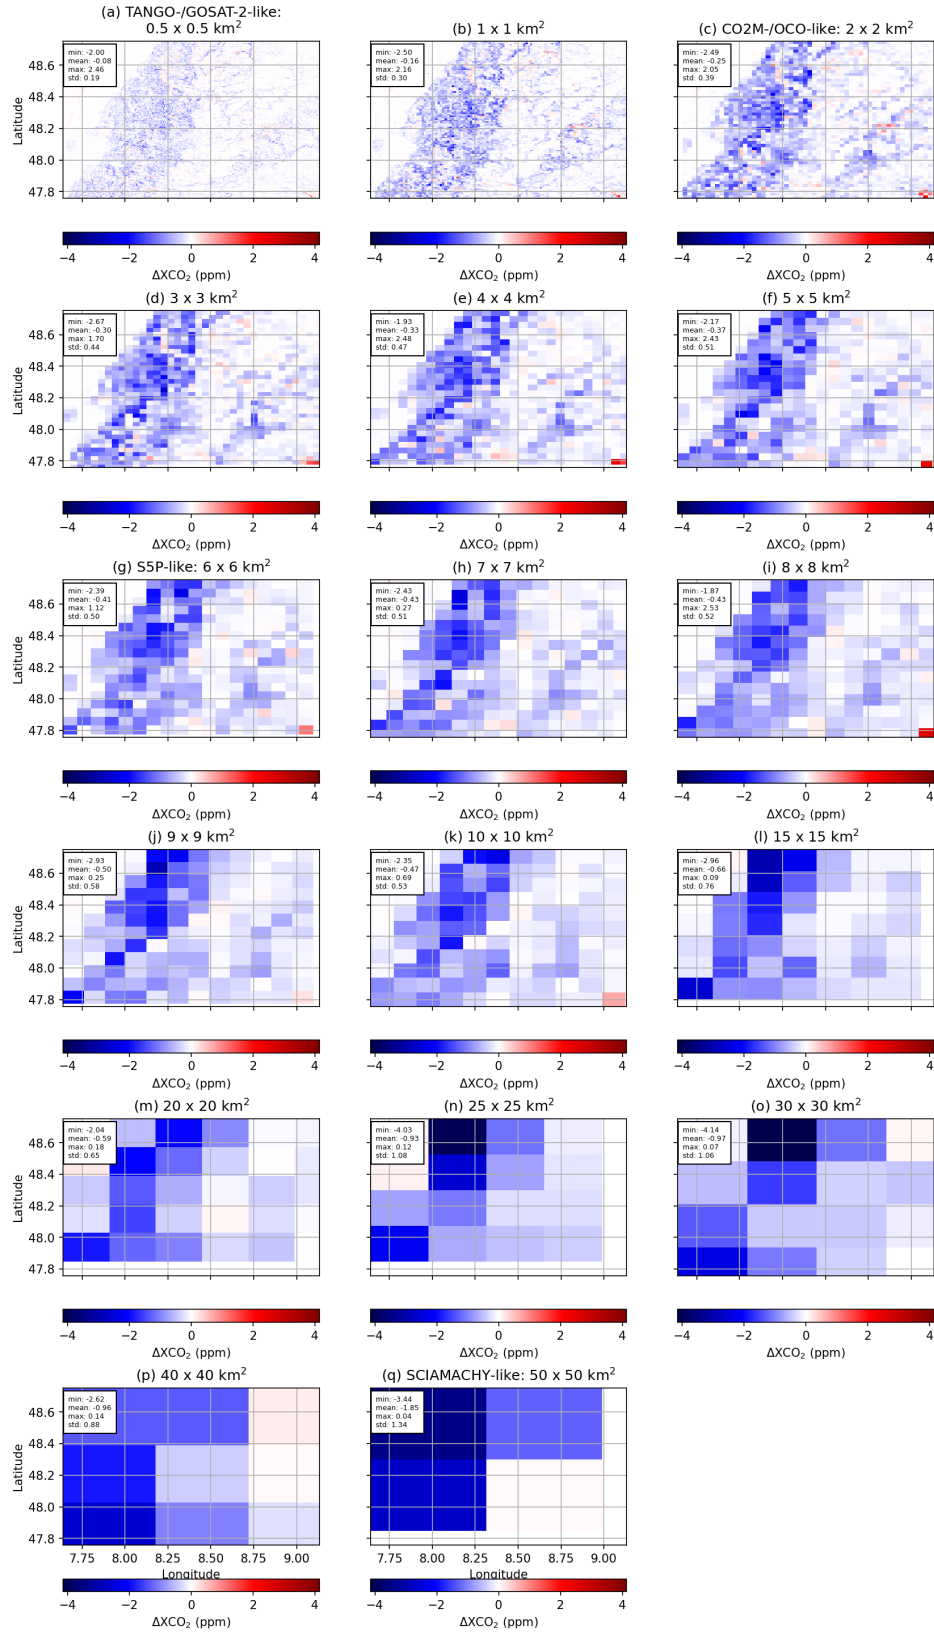

**Figure S6.**  $\Delta XCO_2$  with variable size of the spatial samples as in the left column of Fig. 21 of the main text, but for more spatial sample sizes.

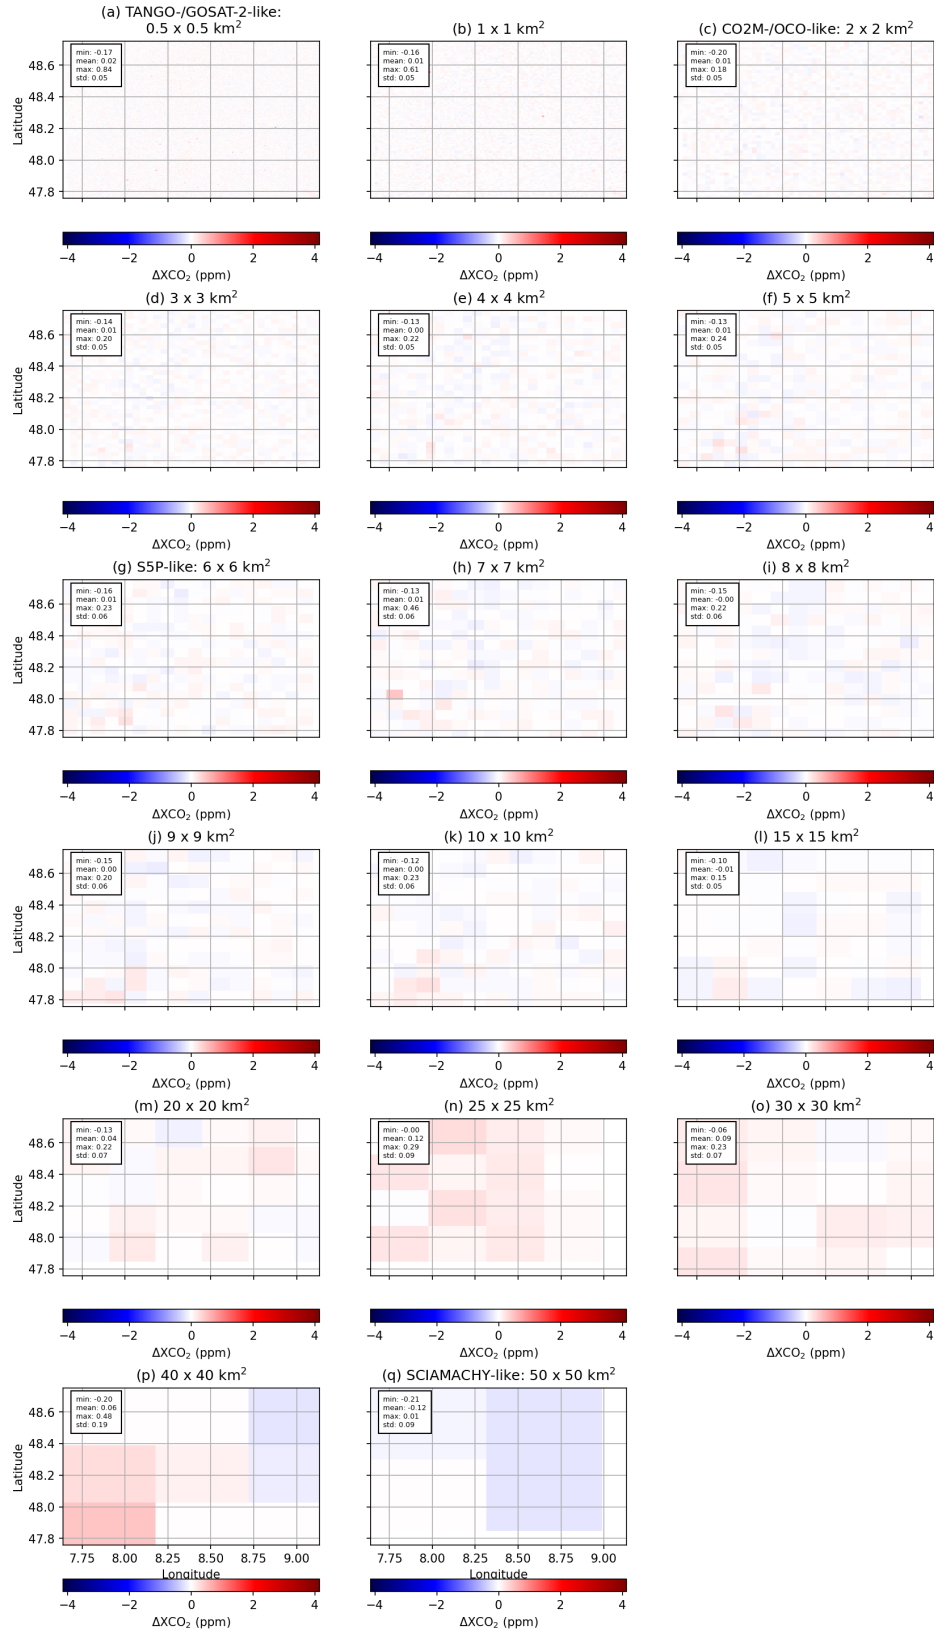

**Figure S7.**  $\Delta XCO_2$  with variable size of the spatial samples as in the center column of Fig. 21 of the main text, but for more spatial sample sizes.

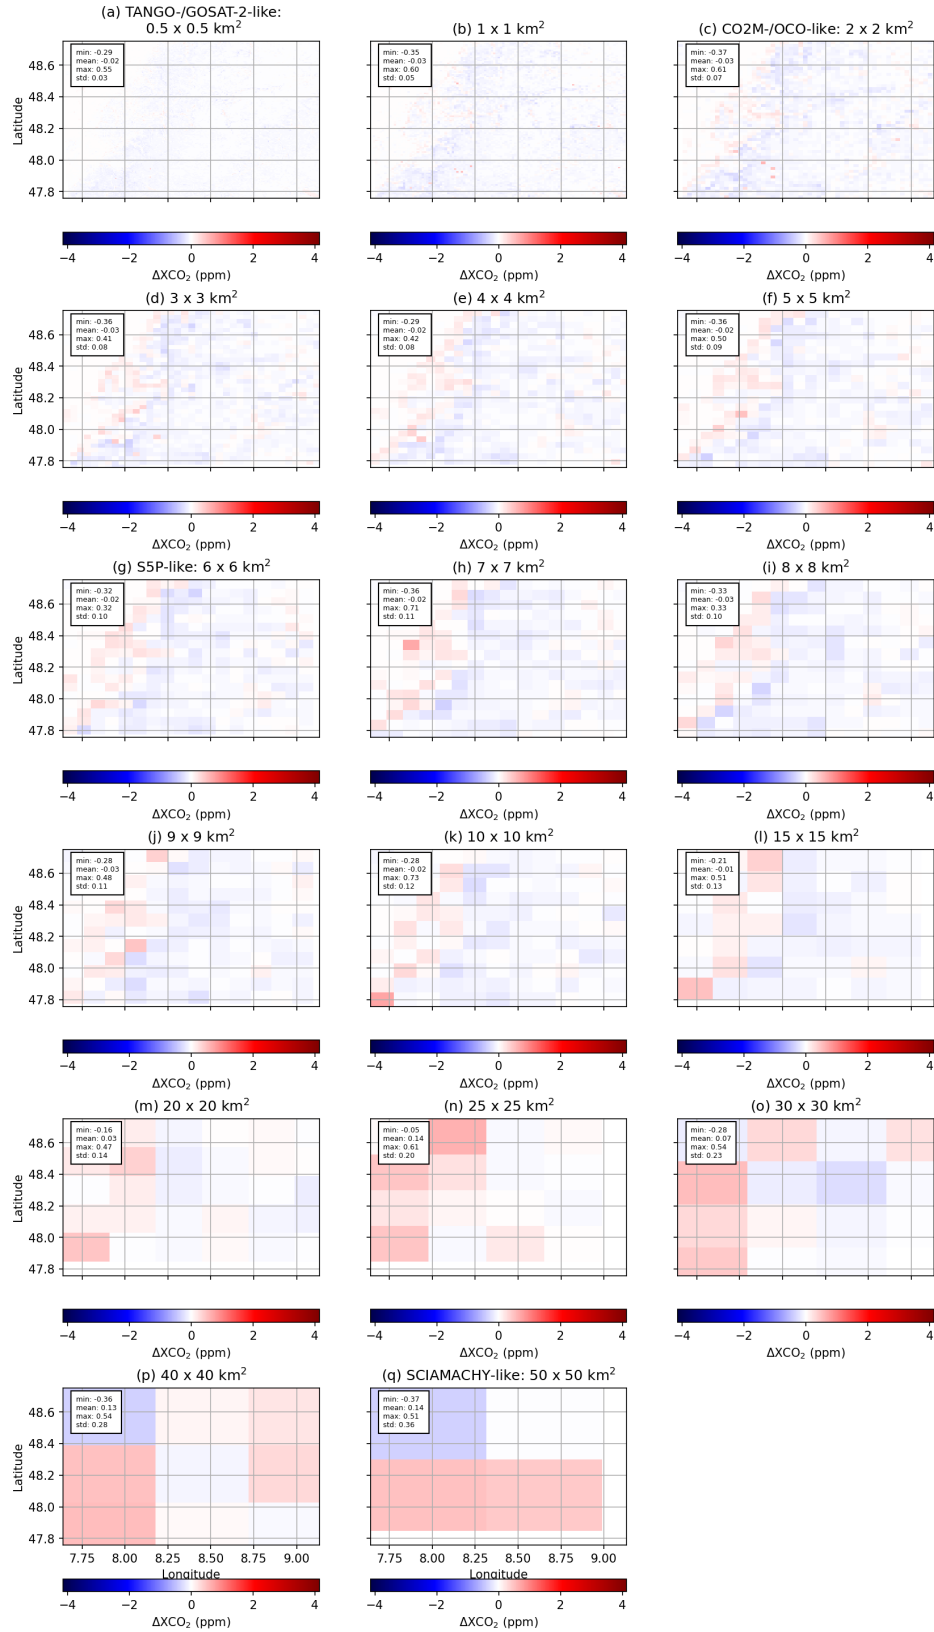

**Figure S8.**  $\Delta\text{XCO}_2$  with variable size of the spatial samples as in the right column of Fig. 21 of the main text, but for more spatial sample sizes.
